# Supplementary material
Source: publisher site journal article supplement (https://www.dovepress.com/article/409905)
Supplement: Supplementary file 1 [file get_supplementary_file.php]

# Supplementary materials

| Patient | Age | Gender | VA with correction (logMAR) | Visual field defect | Diagnosis | Medication |
| --- | --- | --- | --- | --- | --- | --- |
| s1 | 65 | Male | -0.1 | RHH | Stroke left occipital cortex | Clopidogrel, ezetimibe, nifedipine, pantoprazole, simvastatine, tamsulosine |
| s2 | 56 | Male | 0 | ILQ | Stroke right occipital cortex | Acenocoumarol, acetylsalicylic acid, amlodipine, citalopram, metoprolol, perindopril, rosuvastatin |
| s3 | 28 | Male | -0.1 | RHH | Stroke left occipital cortex after tumor resection left frontal cortex | Levetiracetam |
| s4 | 58 | Male | 0 | RHH | Stroke left occipital cortex | Clopidogrel |
| s5 | 71 | Male | 0 | ILQ | Stroke right occipital cortex | Simvastatin, apixaban, levetiracetam, hydrochlorothiazide, digoxin, losartan, tramadol |
| s6 | 57 | Male | -0.1 | LHH | Stroke right occipital cortex | Metoprolol, pantoprazole, rosuvastatin, lisinopril, desloratadine |
| s7 | 68 | Male | 0 | RHH | Stroke left occipital cortex | Acetylsalicylic acid, simvastatin |
| s8 | 73 | Male | 0 | LHH | Stroke right occipital cortex | Clopidogrel, losartan, simvastatin |
| s9 | 74 | Male | 0 | LHH | Stroke right occipital cortex | Perindopril, rosuvastatin, clopidogrel, hydrochlorothiazide, amitriptyline, pantoprazole |
| s10 | 51 | Female | 0 | LHH | Stroke right occipital cortex | Amlodipine, lisinopril |
| s11 | 64 | Male | 0 | LHH | Stroke right occipital cortex | Bisoprolol, eplerenone, perindopril, atorvastatin, acetylsalicylic acid |
| s12 | 79 | Male | 0 | LHH | Stroke right occipital cortex | Atorvastatin, acetylsalicylic acid |
| s13 | 49 | Female | 0 | LHH | Stroke right occipital cortex | Amlodipine, candesartan, spironolactone |
| s14 | 46 | Male | 0.05 | RHH | Stroke left occipital cortex | Acenocoumarol, formoterol, levocetirizine |
| s15 | 49 | Female | -0.1 | SRQ | Stroke left occipital cortex | Clopidogrel, simvastatin |
| s16 | 63 | Male | 0 | LHH | Stroke right occipital cortex | Atorvastatin, clopidogrel, amlodipine, lisinopril |
| s17 | 57 | Male | 0 | RHH | Stroke left occipital cortex | Simvastatin, clopidogrel, pantoprazole |
| s18 | 67 | Male | 0 | ILQ | Stroke right occipital cortex | Clopidogrel, pantoprazole, pravastatin |
| s19 | 55 | Female | 0 | SRQ | Stroke left occipital cortex | Valsartan |
| s20 | 28 | Male | -0.2 | LHH | Stroke right occipital cortex after resection arteriovenous malformation | Mebeverine, fexofenadine |

**Table S1.** Patient demographics. VA = visual acuity (in logMAR); LHH = (partial) left homonymous hemianopia; RHH = (partial) right homonymous hemianopia; ILQ = inferior left homonymous quadrantanopia; SRQ = superior right homonymous quadrantanopia.

|  | Equiluminant yellow | Cyan | White |
| --- | --- | --- | --- |
| Yellow | *t18*= 2.91, ***p*****= 0.009** | *t18*= 0.54, *p*= 0.60 | *t18*= -0.51, *p*= 0.62 |
| Equiluminant yellow | - | *t18*= -1.62, *p*= 0.12 | *t18*= -3.11, ***p*****= 0.006** |
| Cyan | - | - | *t18*= -0.69, *p*= 0.50 |

**Table S2.** Paired student’s t-test comparing pupil response amplitudes across color conditions of Experiment 1. Significant results highlighted in **bold** font.

|  | Dark yellow | Bright multicolor | Dark multicolor |
| --- | --- | --- | --- |
| Bright yellow | *t15* = 4.60, ***p*< 0.001** | *t15*= 0.78, *p*= 0.45 | *t15*= 4.56, ***p*< 0.001** |
| Dark yellow | - | *t15* = -3.62, ***p* = 0.002** | *t15* = -0.97, *p* = 0.35 |
| Bright multicolor | - | - | *t15* = 3.65, ***p* = 0.002** |

**Table S3.** Paired student’s t-test comparing pupil response amplitudes across conditions of Experiment 2. Significant results highlighted in **bold** font.

|  | Dark yellow | Bright multicolor | Dark multicolor |
| --- | --- | --- | --- |
| Bright yellow | *t15* = 2.07, *p*= 0.57 | *t15*= 2.80, ***p* = 0.014** | *t15*= 2.02, *p*= 0.61 |
| Dark yellow | - | *t15* = -0.24, *p*= 0.82 | *t15* = -1.12, *p* = 0.28 |
| Bright multicolor | - | - | *t15* = -0.59, *p*= 0.57 |

**Table S4.** Paired student’s t-test comparing discriminative power (AUC) across conditions of Experiment 2. Significant results highlighted in **bold** font.


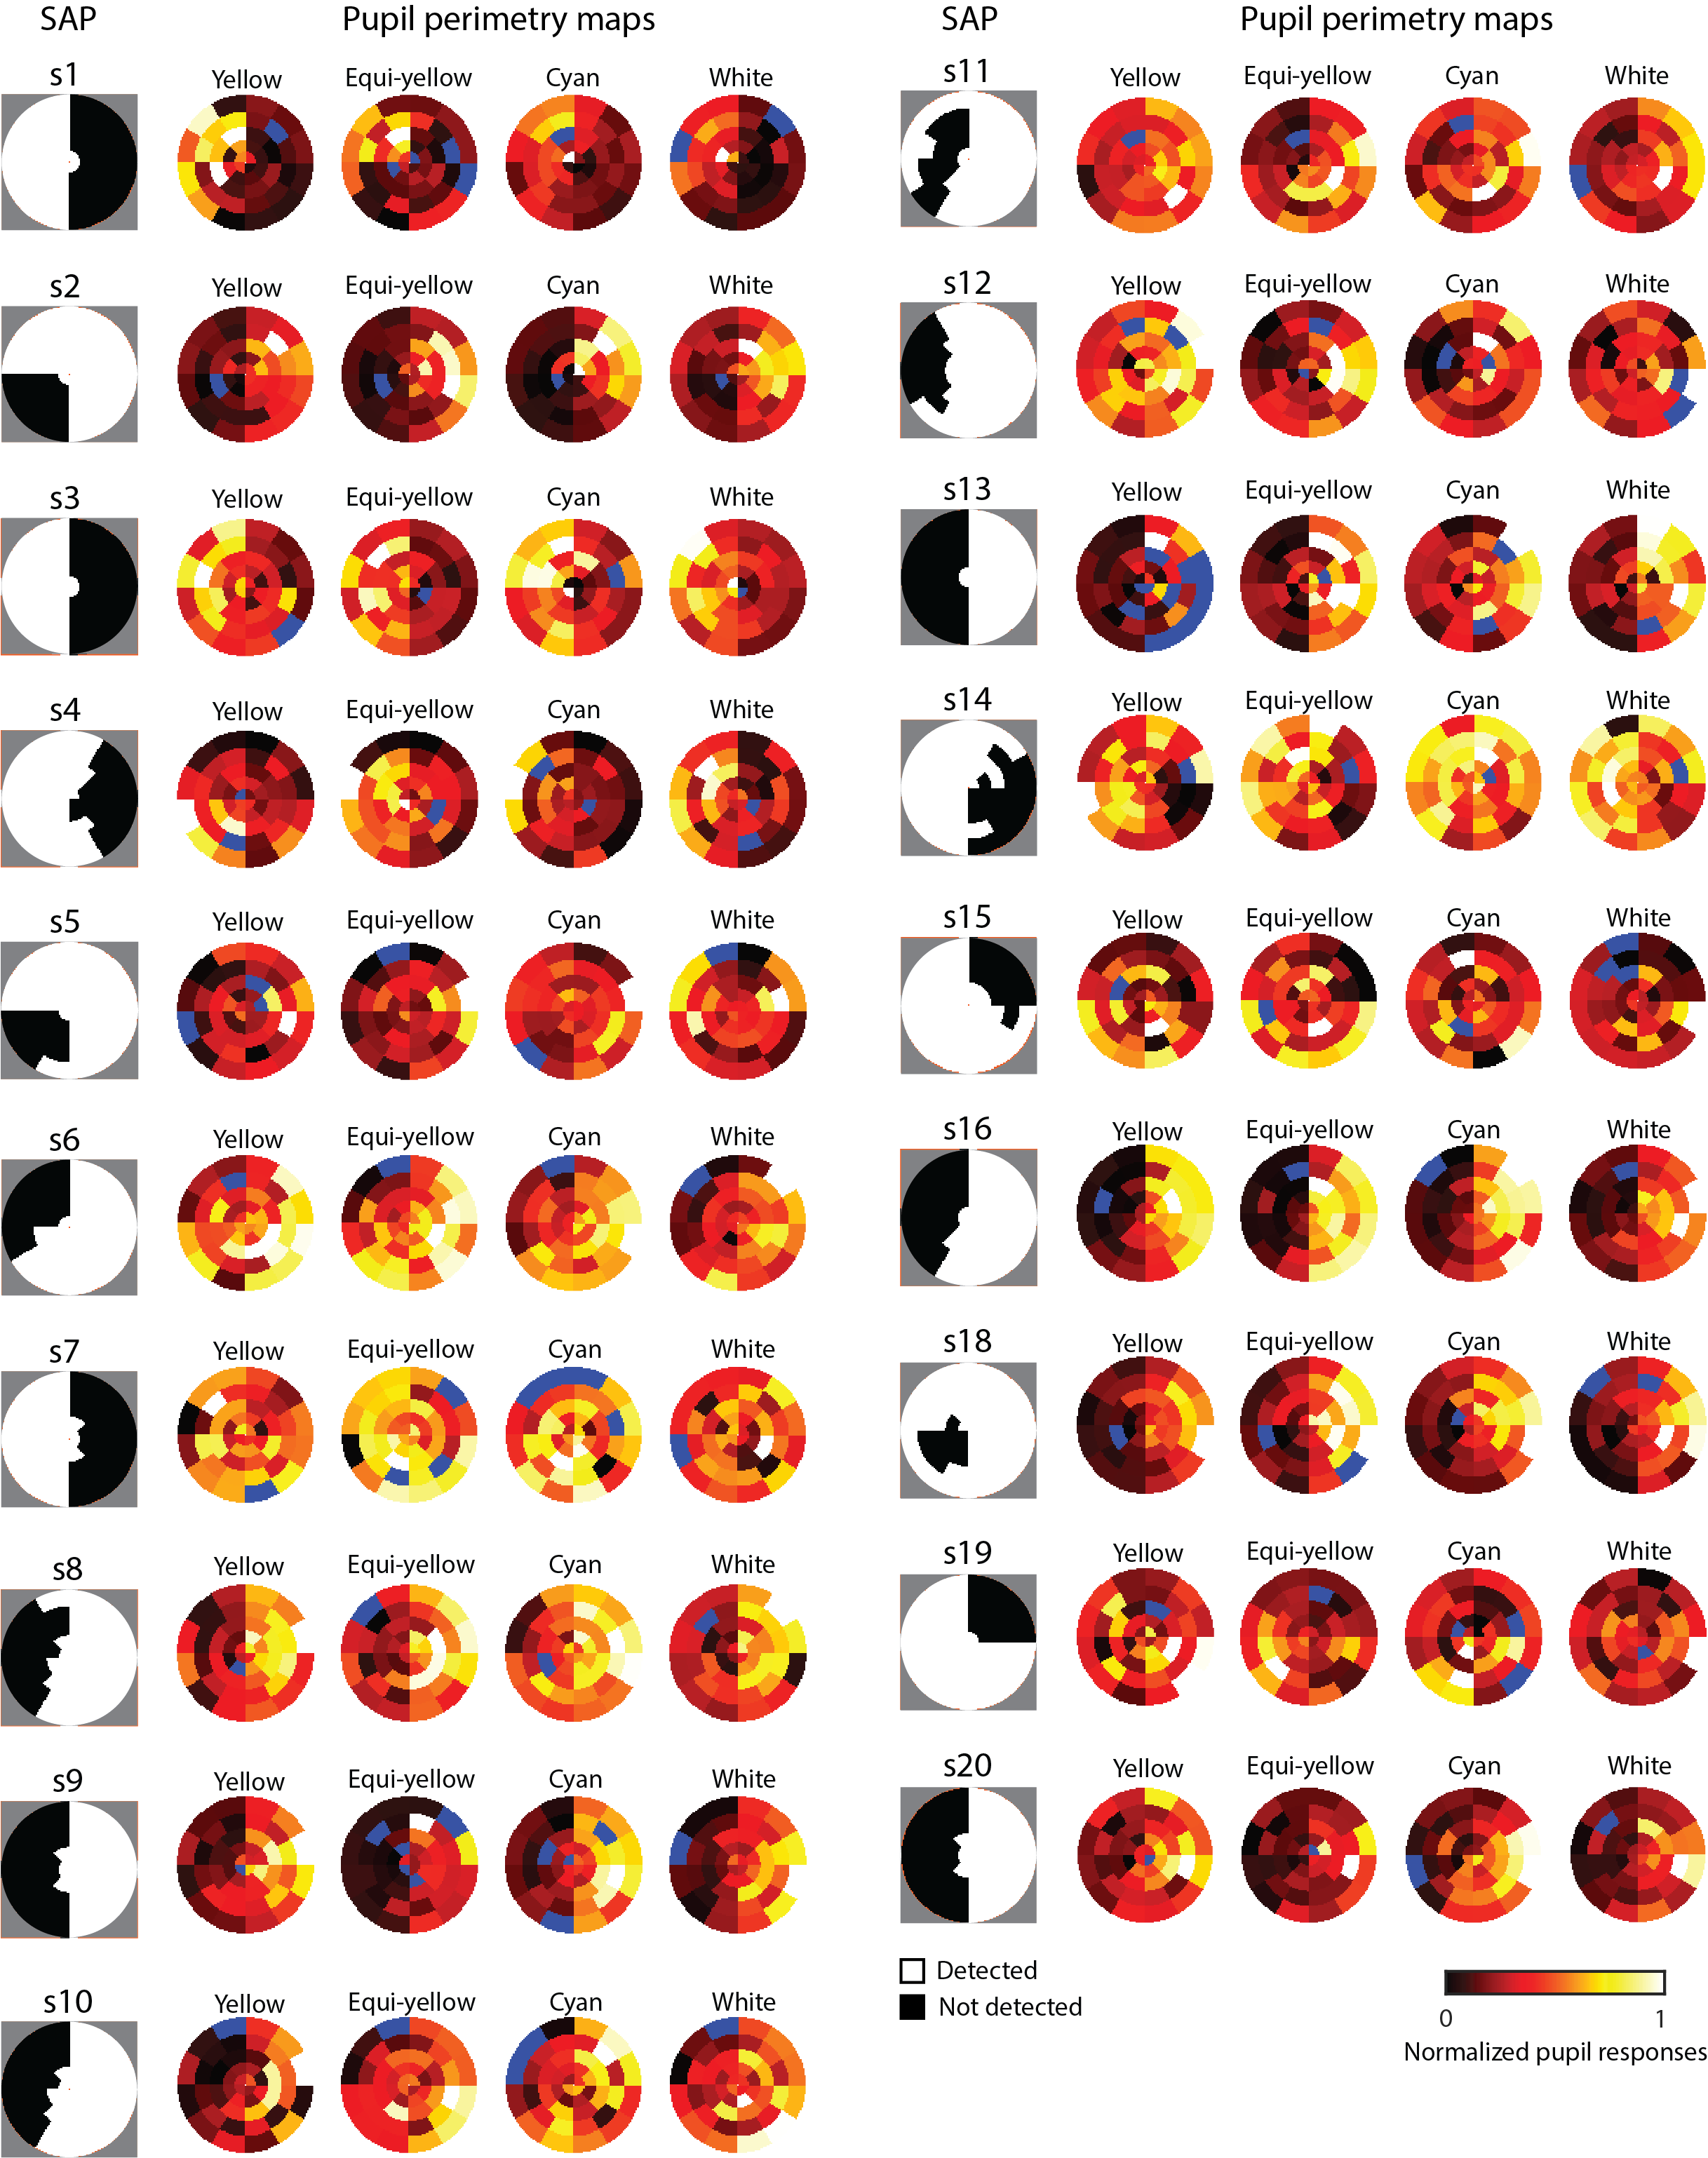


**Figure S1.**  Converted standard automated perimetry (SAP) and normalized pupil perimetry visual field heatmaps (across color conditions) per subject for Experiment 1. The blue wedges in the pupil perimetry maps represent missing trials.


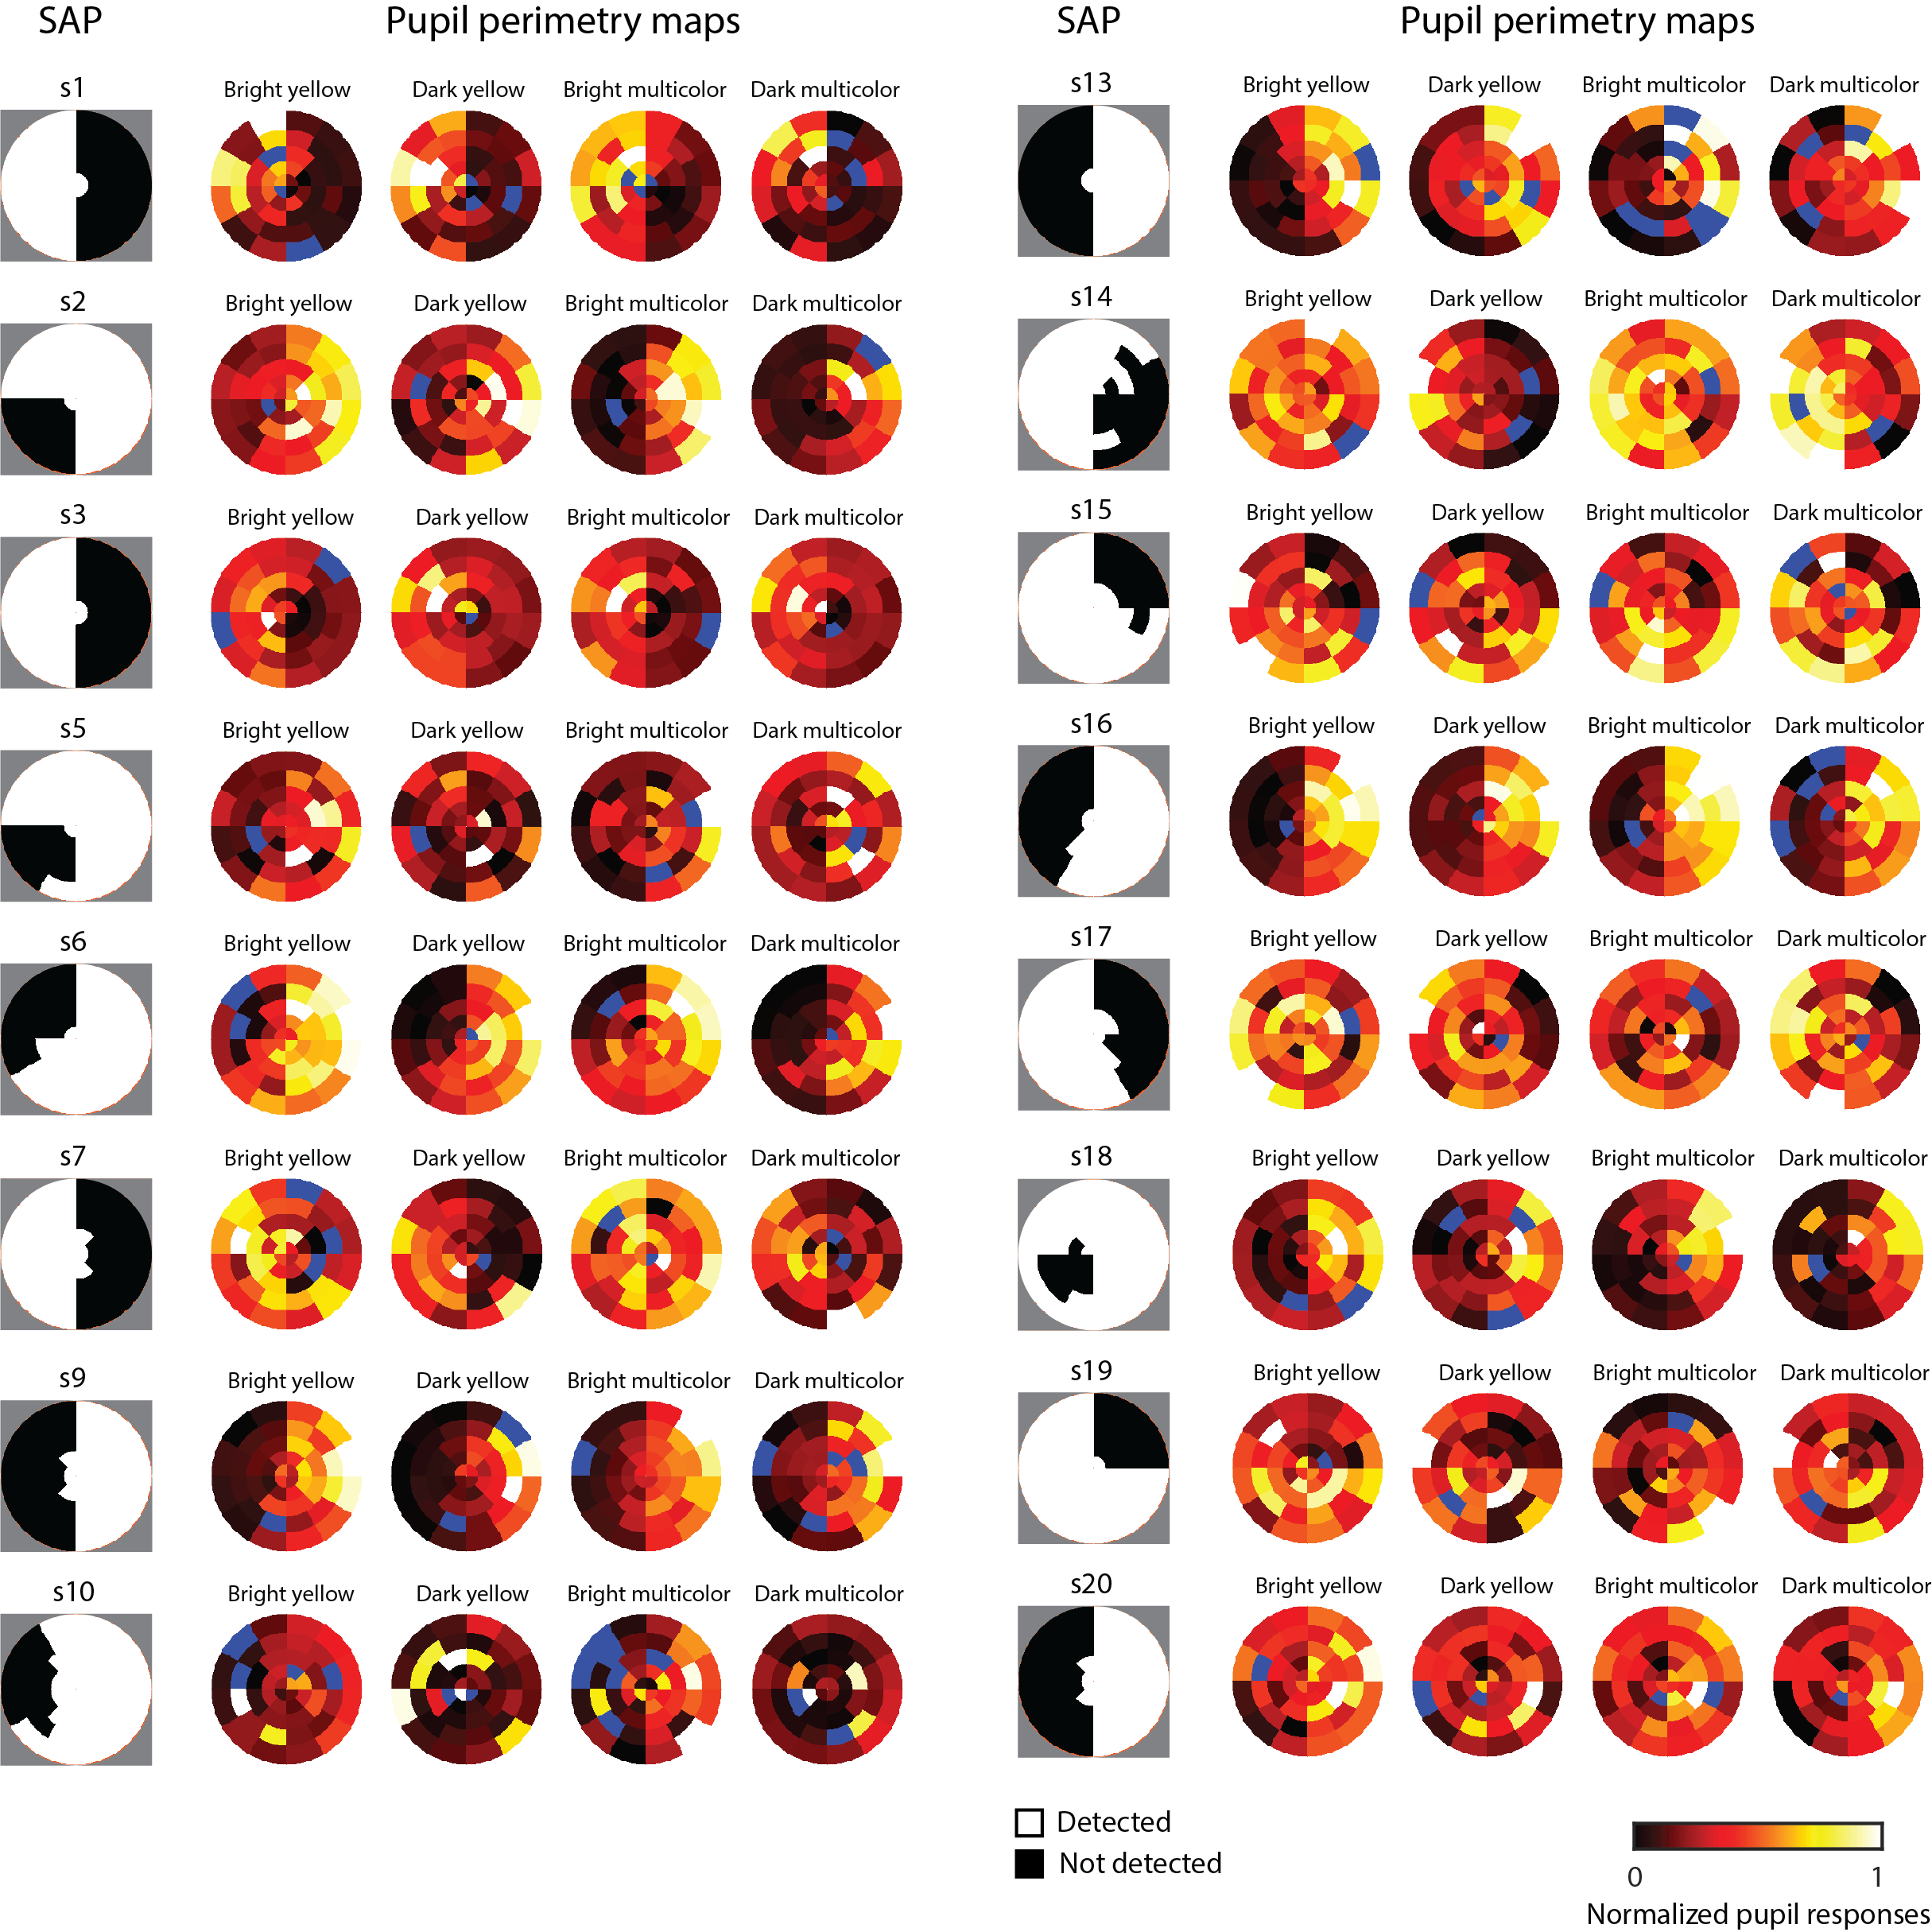


**Figure S2.** Converted standard automated perimetry (SAP) and normalized pupil perimetry visual field heatmaps (across color conditions) per subject for Experiment 2. The blue wedges in the pupil perimetry maps represent missing trials.
